# Supplementary material
Source: PubMed Central journal article supplement (PMC8552194)
Supplement: NIHMS1709085-supplement-ESI.pdf [file NIHMS1709085-supplement-ESI.pdf]

## Supplementary Material for

# Ultrasmall Gd@Cdots as a Radiosensitizing Agent for Non-Small Cell Lung Cancer

*Chaebin Lee,<sup>a</sup> Xiangji Liu,<sup>a</sup> Weizhong Zhang,<sup>a</sup> Michael A. Duncan,<sup>a</sup> Fangchao Jiang,<sup>a</sup> Christine Kim,<sup>a</sup> Xuefeng Yan,<sup>b</sup> Yong Teng,<sup>c</sup> Hui Wang,<sup>b</sup> Wen Jiang,<sup>a\*</sup> Zibo Li<sup>b\*</sup> and Jin Xie<sup>a\*</sup>*

- a. Department of Chemistry, University of Georgia, 140 Cedar Street, Athens, GA 30602, USA  
E-mail: jinxie@uga.edu; wen.jiang@uga.edu
- b. Department of Radiology, University of North Carolina Chapel Hill, Chapel Hill, NC 27599, USA  
Email: zibo\_li@med.unc.edu
- c. Department of Oral Biology and Diagnostic Sciences, Dental College of Georgia, Georgia Cancer Center, Augusta University, Augusta, GA 30912, USA

**Abbreviation list**

|           |                                                             |
|-----------|-------------------------------------------------------------|
| ALT       | Alanine Aminotransferase                                    |
| ATP       | Adenosine Triphosphate                                      |
| BUN       | Urea Nitrogen                                               |
| DLS       | Dynamic Light Scattering                                    |
| DMEM      | Dulbecco's Modified Eagle's Medium                          |
| EDS       | Energy Dispersive Spectroscopy                              |
| ESI       | Electrospray Ionization                                     |
| FBS       | Fetal Bovine Serum                                          |
| ICP-MS    | Inductively Coupled Plasma Mass Spectrometry                |
| LDI       | Laser Desorption Ionization                                 |
| MRI       | Magnetic Resonance Imaging                                  |
| MTT       | 3-(4,5-Dimethylthiazolyl-2)-2,5-diphenyltetrazolium bromide |
| NPs       | Nanoparticles                                               |
| PBS       | Phosphate-Buffered Saline                                   |
| REF       | Radiation Enhancement Factor                                |
| ROS       | Reactive Oxygen Species                                     |
| RPMI 1640 | Roswell Park Memorial Institute Medium 1640                 |
| RT        | Radiation                                                   |
| SEM       | Scanning Electron Microscopy                                |
| SOD       | Superoxide Dismutase                                        |
| SOSG      | Singlet Oxygen Sensor Green                                 |
| STEM      | Scanning Transmission Electron Microscopy                   |
| TA        | Terephthalic Acid                                           |
| TEM       | Transmission Electron Microscopy                            |

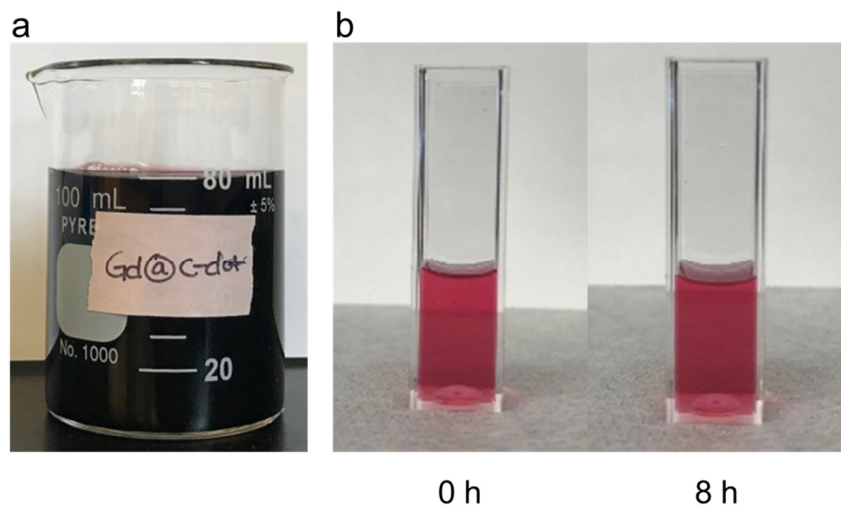

**Figure S1.** a) As-synthesized Gd@Cdots dispersed in water. b) Gd@Cdots solution in PBS at 0 h and 8 h. No precipitation was observed over incubation.

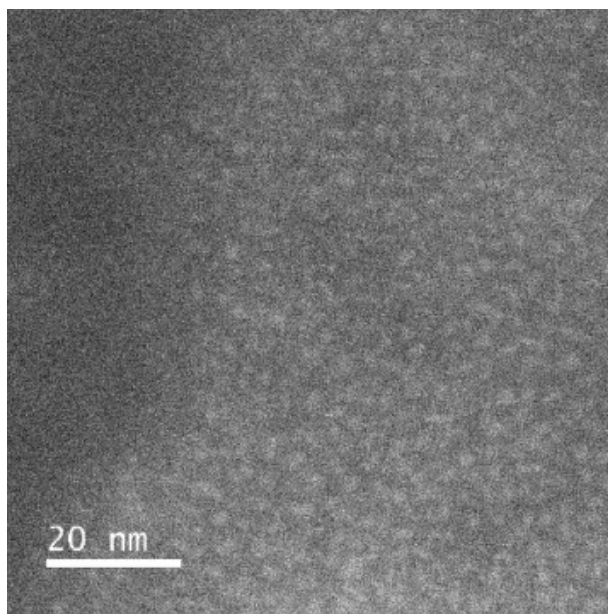

**Figure S2.** STEM image of Gd@Cdots.

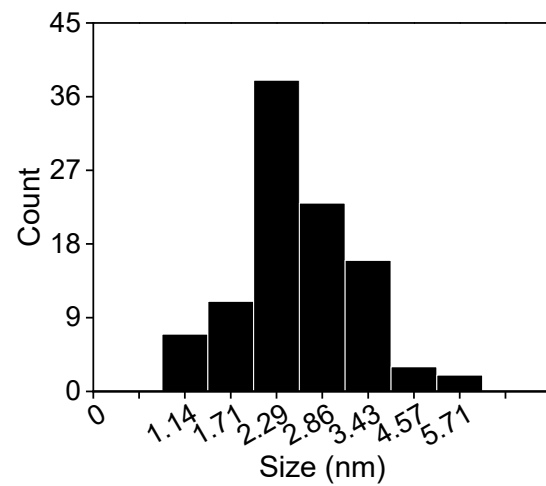

**Figure S3.** Statistics on size the distribution of Gd@Cdots, based on TEM results.

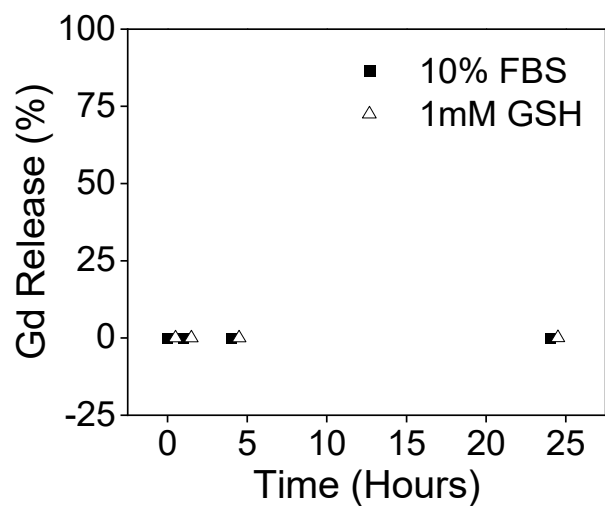

**Figure S4.** Gd release when Gd@Cdots were incubated in 10% fetal bovine serum (FBS) or solutions containing 1 mM glutathione (GSH). Gd was quantified by ICP-MS.

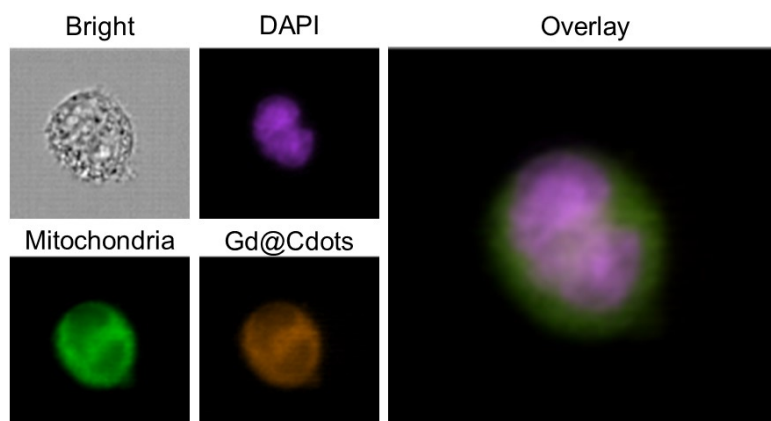

**Figure S5.** Gd@Cdots accumulation in mitochondria (stained with MitoTracker green). Images were acquired on an ImageStream X Mark II Imaging Flow Cytometer.

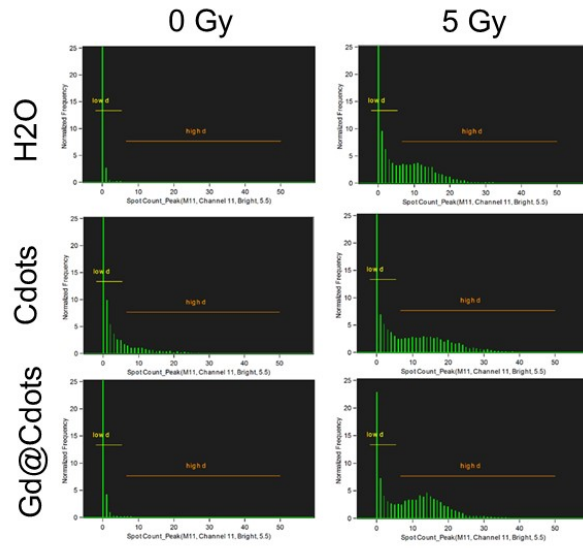

| Population                                        | %       |       |          |      |           |              |
|---------------------------------------------------|---------|-------|----------|------|-----------|--------------|
|                                                   | Control | Cdots | Gd@Cdots | RT   | Cdots +RT | Gd@Cdots +RT |
| DAIP positive rh2aX & cell & focused              | 100     | 100   | 100      | 100  | 100       | 100          |
| low fluorescence & DAIP positive rh2aX & focused  | 99.7    | 87.6  | 99.6     | 56.1 | 48.6      | 42.4         |
| high fluorescence & DAIP positive rh2aX & focused | 0.29    | 10.7  | 0.39     | 40.6 | 48.9      | 55           |

**Figure S6.** Statistics for cell  $\gamma$ H2AX loci numbers, evaluated by ImageStream X Mark II Imaging Flow Cytometer.



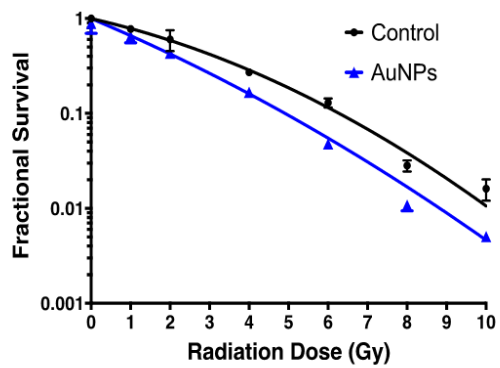

| Group  | a     | b     | SF4   | REF4  |
|--------|-------|-------|-------|-------|
| Contro | 0.218 | 0.024 | 0.285 | 1.759 |
| AuNPs  | 0.403 | 0.013 | 0.162 |       |

**Figure S7.** Clonogenic assay with Au nanoparticles (10  $\mu\text{g}/\text{mL}$ ) and linear-quadratic data fitting.

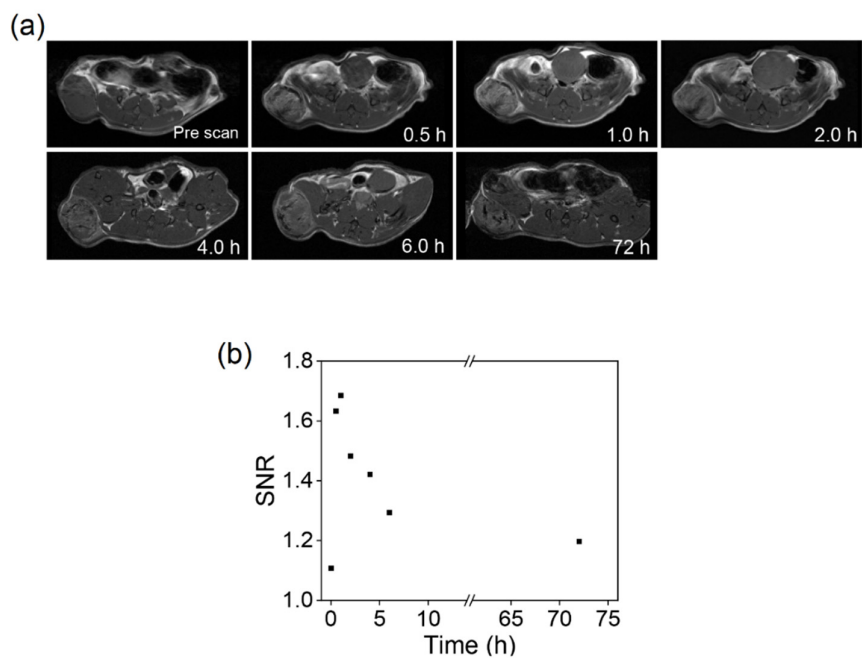

**Figure S8.** *In vivo* MRI scans. The studies were performed with H1299 tumor bearing nude mice ( $n = 3$ ) on a Varian 7T magnet. When the tumor size reached  $500 \text{ mm}^3$ , Gd@Cdots ( $0.1 \text{ mmol/kg}$  based on Gd) were intravenously injected. Transverse and coronal  $T_1$ -weighted MR images were obtained at 0.5, 1, 2, 4, 6, and 72 h using the following parameters: field-of-view (FOV) =  $70 \times 70 \text{ mm}^2$ , TR/TE = 500/12 ms, matrix size =  $256 \times 256$ , slice = 4, thickness = 1 mm. The signal to background ratio was calculated using ImageJ software. a)  $T_1$ -weighted MRI images, taken at different time points after Gd@Cdots injection ( $0.1 \text{ mmol Gd/kg}$ ). b) Signal-to-background ratios (SNRs), based on imaging results from a).

|             | Unit                  | Reference<br>(95% interval) |        | Experiment |       |         |        |
|-------------|-----------------------|-----------------------------|--------|------------|-------|---------|--------|
|             |                       |                             |        | Control    |       | Gd@Cdot |        |
|             |                       | Low                         | High   | Average    | Std   | Average | Std    |
| RBC         | x 10 <sup>6</sup> /ul | 8.16                        | 11.69  | 11.75      | 0.21  | 11.10   | 0.26   |
| HGB         | g/dl                  | 12.40                       | 18.90  | 18.50      | 0.14  | 17.30   | 0.61   |
| HCT         | %                     | 43.50                       | 67.00  | 54.60      | 1.84  | 52.67   | 2.06   |
| MCV         | fl                    | 50.80                       | 64.10  | 46.60      | 0.85  | 47.57   | 0.67   |
| MCH         | pg                    | 13.00                       | 17.60  | 15.75      | 0.07  | 15.63   | 0.47   |
| MCHC        | g/dl                  | 23.90                       | 33.10  | 33.85      | 0.78  | 32.40   | 1.27   |
| RDW         | %                     | 16.90                       | 23.50  | 13.75      | 0.35  | 14.10   | 0.17   |
| Platelets   | x10 <sup>3</sup> /ul  | 476.00                      | 1661.0 | 229.50     | 94.05 | 538.67  | 250.23 |
| MPV         | fl                    | 4.60                        | 5.80   | 5.55       | 0.49  | 6.17    | 0.15   |
| WBC         | x10 <sup>3</sup> /ul  | 5.69                        | 14.84  | 6.00       | 1.41  | 7.03    | 0.45   |
| Neutrophils | x10 <sup>3</sup> /ul  | 0.74                        | 3.01   | 1.27       | 0.11  | 1.38    | 0.41   |
| Lymphocytes | x10 <sup>3</sup> /ul  | 3.60                        | 11.56  | 4.03       | 1.24  | 5.18    | 0.56   |
| Monocytes   | x10 <sup>3</sup> /ul  | 3.75                        | 14.33  | 0.10       | 0.06  | 0.23    | 0.07   |
| Eosinophils | x10 <sup>3</sup> /ul  | 0.01                        | 0.35   | 0.34       | 0.41  | 0.12    | 0.05   |
| Basophils   | x10 <sup>3</sup> /ul  | 0.00                        | 0.16   | 0.27       | 0.18  | 0.12    | 0.04   |
| BUN         | mg/dL                 | 7.00                        | 31.00  | 24.39      | 4.19  | 21.17   | 3.71   |
| ALT         | unit/L                | 40.00                       | 170.00 | 58.29      | 3.63  | 54.10   | 1.50   |

**Table S1.** Complete blood count (CBC) results as well as liver & kidney function tests.
